# Supplementary material for: Molecular Detection of Toxoplasma gondii, Neospora caninum and Encephalitozoon spp. in Vespertilionid Bats from Central Europe
Source: MDPI journal article supplement (doi:10.3390/ijms24129887), 2023-06-08
Supplement: s1 [file s1]

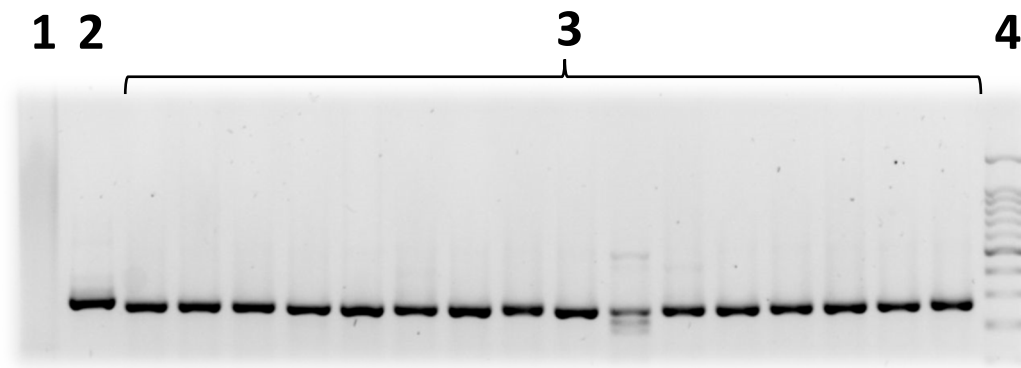

**Supplemental Figure S1.** Example of agarose gel with products of the second reaction from nested PCR to detect *Encephalitozoon cuniculi* in tissue of bats. (1) negative control (PCR grade water), (2) positive control 300 bp (DNA from spores of *E. cuniculi*) (3) *M. myotis* samples positive to *E. cuniculi*, (4) ladder (100 bp)

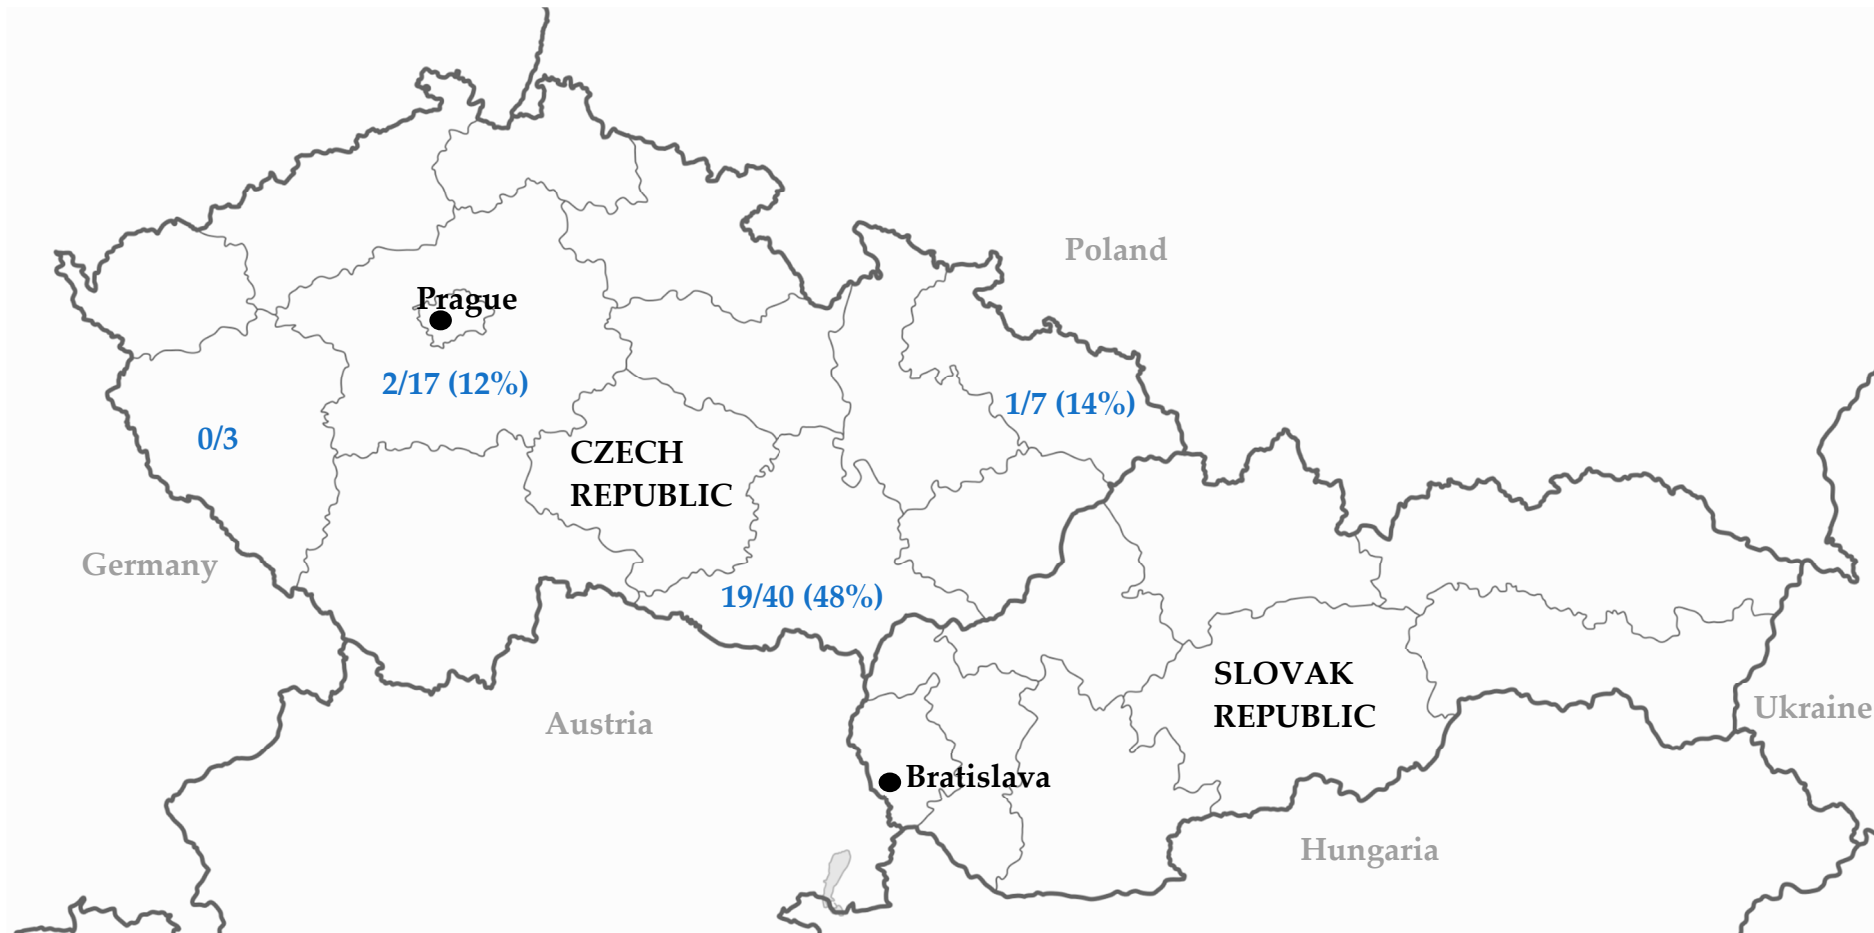

**Supplemental Figure S2.** The map of the Czech Republic and the Slovak Republic showing localities where bats (52 *Myotis myotis*, 43 *Nyctalus noctula* and 5 *Vespertilio murinus*) were collected with the prevalence of *Encephalitozoon cuniculi*: Central Bohemian 12% (2/17), Moravian-Silesian 14% (1/7), Plzeň (0/3), South Moravia 48% (19/40), the Czech Republic with no information about locality 12% (2/17), the Slovak Republic with no information about locality (0/10).
